# Supplementary material
Source: bioRxiv or medRxiv preprint supplement (https://medrxiv.org/highwire/filestream/73009/field_highwire_adjunct_files/1/2020.02.25.20027953-2.pdf)

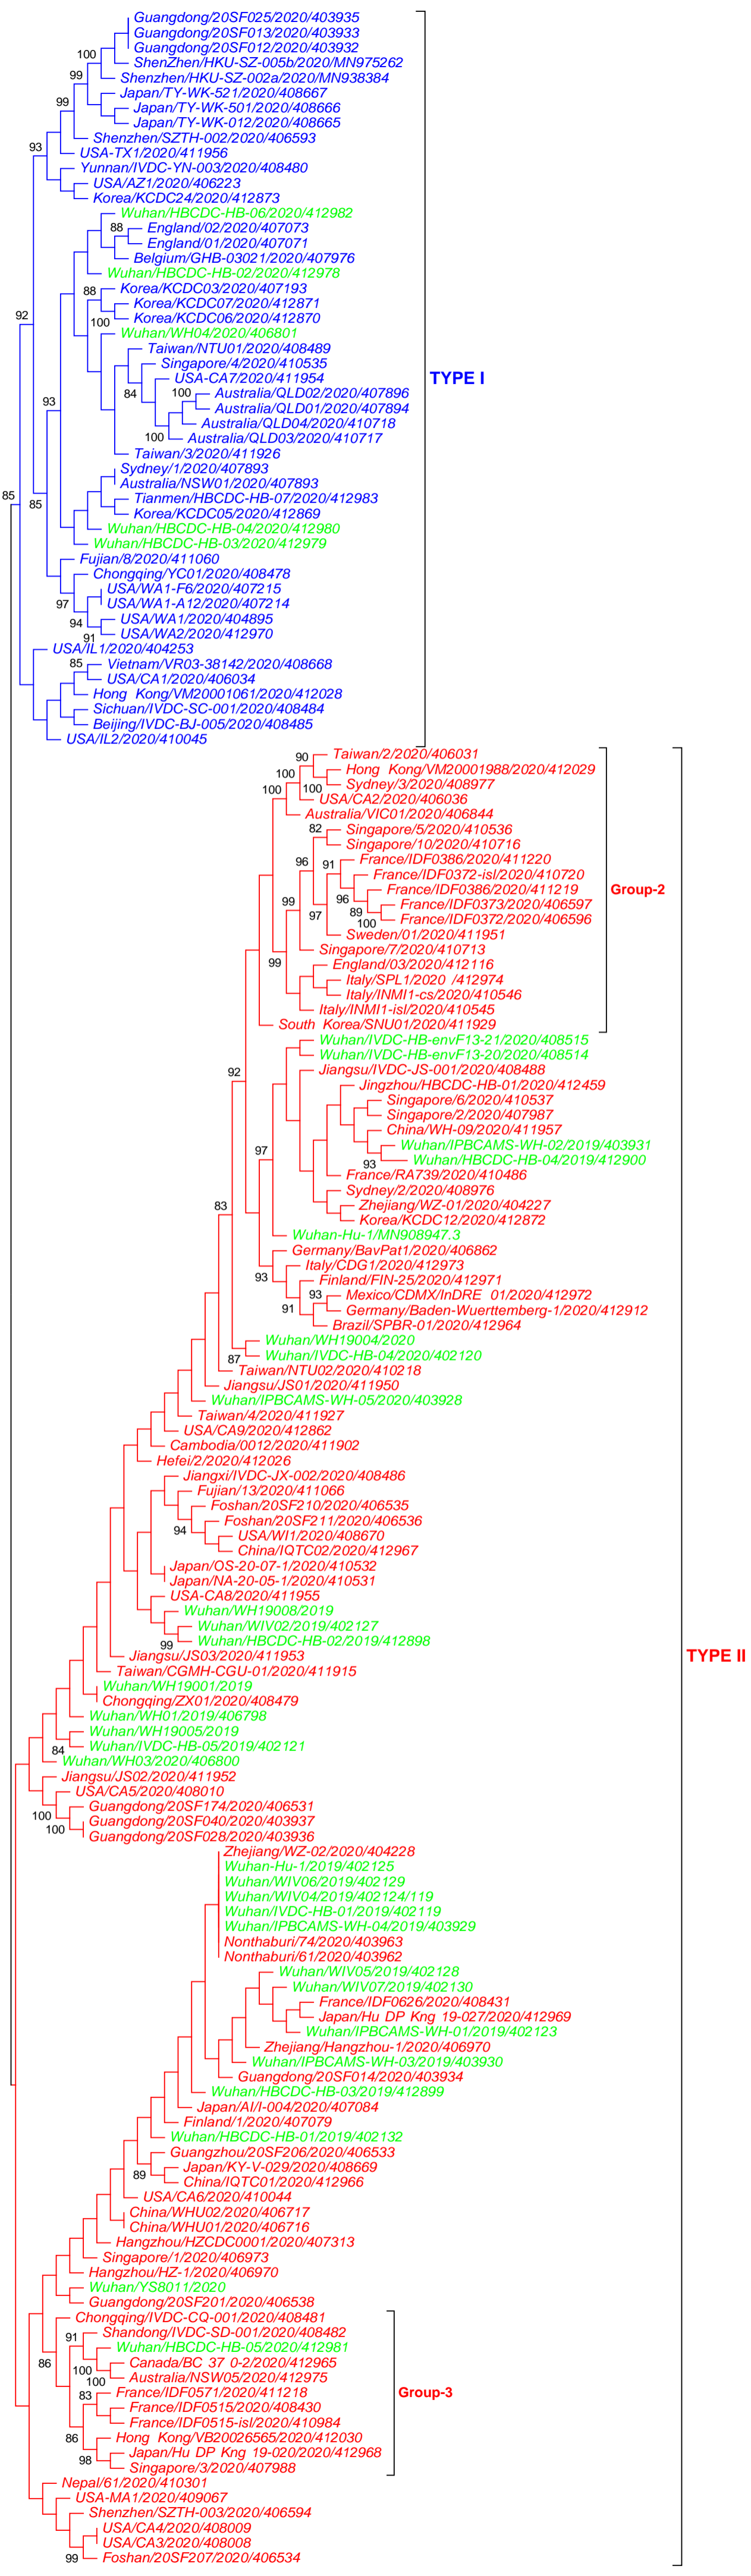

Supplement: Supplementary file [file 2020.02.25.20027953-2.pdf]
